# Supplementary material
Source: HighWire-hosted journal article supplement (https://bmjopen.bmj.com/content/8/5/e020566)
Supplement: inline-supplementary-material-1 [file inline-supplementary-material-1.pdf]

## Appendix 1: Interview Guide

1. Please introduce yourself: what is your function and how long have you been working in this unit?
2. Were you informed about the new process to obtain a BPMH? How and by whom?
3. Could you please describe in your own words what a best possible or systematic medication history is?
4. *Nursing staff only*: Do you know where the preadmission medications are documented? If yes, do you work with this list? How useful is it for your work?
5. What is your role (tasks, responsibility, competency) in obtaining a best possible medication history?
6. What is, in your view, the role of the other professional groups (physicians, nurses, pharmaceutical staff)?
7. On a scale from 1 (very bad) to 6 (very good), how would you rate the current collaboration with the other professional groups in regard to obtaining a BPMH? Please explain.
8. Do you notice a difference compared to before? Has the collaboration changed since the introduction of the new processes (positively or negatively)? If yes, what exactly is different? How do you see this change?
9. In your opinion, has it proved to be of value that pharmacy technicians obtain a BPMH? Please explain. What advantages or disadvantages do you see with this model?
10. Has your own daily work changed since the introduction of a best possible medication history? If yes, what is different? Can you give an example?
11. *Physicians only*: In order for you to write a good admission order - do you think the additional effort required for a BPMH is worth the additional benefit? Please explain.
12. On a scale from 1 (not important at all) to 6 (very important), in your opinion how important is the best possible medication history to reduce medication errors in your hospital? Please explain.
13. What kind of medication errors can be avoided with obtaining a best possible medication history? Can you give an example of an error that was avoided?
14. In your experience, how do patients react when they are being interviewed about their preadmission medication?
15. Did you experience a change in their behavior since the introduction of the structured patient interview?
16. If you had to narrow it down, for which patient group would you consider the BPMH to be especially beneficial?
17. On a scale from 1 (not smooth at all) to 6 (very smooth), how smoothly is the new BPMH process running in your hospital?
18. Where do you see room for improvement?
19. Would you recommend extending the new processes to other units? Why / why not?
20. Do you have any additional comments?

---

Translated from German original. Questions analyzed for this study are highlighted.
